# Supplementary material
Source: publisher figshare collection journal article supplement (https://rs.figshare.com/ndownloader/files/28924052)
Supplement: Supplementary file 1 [file 28924052]

Species	Group_Size	Repertoire_Size	Appeasement_Dominance_Signals	Groom_DII	High_Intensity	Counteraggression	DII_Aggression	DOMINANCE_STYLE_SCORE
Alouatta_pigra	5.33	12	0	0.3	0.5167	0.7	0.33	1.548157552
Ateles_geoffroyi	19	24	5	0.23	1	0.1324	0.4	0.050032084
Cebus_capucinus	22.67	20	5	0.24	NA	NA	NA	NA
Cercocebus_torquatus_atys	65	18	2	0.35	0.0763	NA	0.06	0.226371752
Cercopithecus_ascanius	17	5	0	0.31	NA	NA	0.13	0.188263215
Cercopithecus_campbelli	7.5	17	1	0.44	NA	NA	NA	NA
Cercopithecus_diana	11	11	0	0.25	NA	NA	NA	NA
Chlorocebus_pygerythrus	37.67	25	3	0.35	0.1036	0.2709	0.09	0.467556973
Eulemur_fulvus_rufus	8.75	10	2	0.5	0.3885	0.1178	0.18	0.093843222
Eulemur_mongoz	4	9	1	0.42	NA	NA	NA	NA
Gorilla_beringei	13	16	5	0.1	0.737	0.1188	0.09	-0.621307536
Gorilla_gorilla_gorilla	6	14	0	NA	0.0111	0.2424	0.06	0.432829708
Indri_indri	3.71	18	0	0.47	0.6889	0.2611	0.31	0.408500651
Lemur_catta	12.4	22	4	0.5	NA	NA	0.08	-0.282394822
Macaca_assamensis	65	16	3	0.17	0.2196	0.0529	0.09	-0.105343513
Macaca_fuscata	29.5	34	16	0.43	NA	0	0	-0.931040342
Macaca_nigra	54	11	0	0.27	0.1643	0.0589	0.03	-0.21283994
Macaca_radiata	18	21	7	0.22	0.2205	0.006	0.04	-0.355474474
Macaca_sylvanus	24.5	14	0	0.29	0.1847	0.171	0.09	0.170166179
Pan_paniscus	24	38	0	0.41	0.1694	NA	0.03	-0.089025575
Pan_troglodytes_schweinfurthii	40.5	13	4	0.32	0.5053	0.0383	0.04	-0.647290468
Papio_anubis	26.49	7	1	0.22	0.1687	0	0.09	-0.145758321
Papio_cynocephalus	53.6	7	1	0.28	NA	NA	0.02	-0.847184466
Papio_cynocephalus_kindae	67	7	1	NA	0.1037	0.0318	0.02	-0.221855057
Theropithecus_gelada	10.17	14	3	0.4	0.2336	0.0422	0.13	-0.018315592
